# Supplementary material
Source: PubMed Central journal article supplement (PMC7583647)
Supplement: NIHMS1610330-supplement-Supplement.pdf [file NIHMS1610330-supplement-Supplement.pdf]

## Supplementary Online Content

Metcalfe D, Perry DC, Claireaux HA, Simel DL, Zogg CK, Costa ML. Does this patient have hip osteoarthritis: the Rational Clinical Examination systematic review. *JAMA*. doi:10.1001/jama.2019.19413

**eTable 1.** Literature Search

**eTable 2.** Characteristics of Included Studies

**eTable 3.** Quality Assessment of Included Studies Using Rational Clinical Examination Levels of Evidence and QUADAS-2

**eTable 4.** History Findings and Likelihood of Hip Osteoarthritis

**eTable 5.** Physical Examination Findings and Likelihood of Hip Osteoarthritis

**eTable 6.** Combinations of Clinical Signs and Likelihood of Hip Osteoarthritis

**eReferences**

This supplementary material has been provided by the authors to give readers additional information about their work.

## eTable 1. Literature Search

### Ovid MEDLINE(R) Epub Ahead of Print, In-Process & Other Non-Indexed Citations, Ovid MEDLINE(R) Daily and Ovid MEDLINE(R) 1946 to 2019 November 1st

- 1 exp physical examination/
- 2 exp medical history taking/
- 3 clinical sign\$.tw
- 4 clinical exam\$.tw
- 5 physical exam\$.tw
- 6 provoca\$.tw
- 7 or/1-6
- 8 exp "sensitivity and specificity"/
- 9 sensitivity.tw
- 10 specificity.tw
- 11 predictive value\$.tw
- 12 likelihood ratio\$.tw
- 13 post-test probability.tw or posttest probability.tw
- 14 ((pre-test or pretest) adj probability).tw
- 15 or/8-14
- 16 exp hip/ or hip.tw
- 17 7 and 15 and 16
- 18 limit 17 to (english language and humans)

### Embase 1974 to 2019 November

- 1 exp physical examination/ (203495)
- 2 clinical sign\$.tw. (144450)
- 3 clinical exam\$.tw. (63022)
- 4 physical exam\$.tw. (93204)
- 5 provoca\$.tw. (25140)
- 6 exp anamnesis/ (200144)
- 7 1 or 2 or 3 or 4 or 5 or 6 (631991)
- 8 sensitiv\$.tw. (1472852)
- 9 specificit\$.tw. (529820)
- 10 post-test probabilit\$.tw. (833)
- 11 posttest probabilit\$.tw. (398)
- 12 ((pre-test\$ or pretest\$) and probabilit\$.tw. (3815)
- 13 predictive value\$.tw. (130600)
- 14 likelihood ratio\$.tw. (16752)
- 15 8 or 9 or 10 or 11 or 12 or 13 or 14 (1796014)
- 16 exp hip/ (50626)
- 17 (hip or hips).tw. (157181)
- 18 16 or 17 (167646)
- 19 7 and 15 and 18 (575)
- 20 19 (575)
- 21 limit 20 to (abstracts and english language) (500)

### PubMed

- 1 physical examination [MeSH]
- 2 medical history taking [MeSH]
- 3 clinical sign\* [tiab]
- 4 clinical exam\* [tiab]
- 5 physical exam\* [tiab]
- 6 provoca\* [tiab]
- 7 #1 OR #2 OR #3 OR #4 OR #5 OR #6

- 8 "sensitivity and specificity"
- 9 Sensitivity [tiab]
- 10 Specificity [tiab]
- 11 predictive value\* [tiab]
- 12 likelihood ratio\* [tiab]
- 13 post-test probabilit\* [tiab] OR posttest probabilit\* [tiab]
- 14 (pre-test OR pretest) AND probability\* [tiab]
- 15 #8 OR #9 OR #10 OR #11 OR #12 OR #13 OR #14
- 16 Hip [Mesh] OR hip [tiab] OR hips [tiab]
- 17 #7 AND #15 AND #16
- 18 limit #17 to (animal studies only)
- 19 #17 NOT #18
- 20 limit #19 to (english language)

**EBSCO CINAHL 1961 - 2019 November**

1. (MH "Physical Examination+")
2. (MH "Patient History Taking+") OR (MH "Medication History")
3. TX "clinical sign\*"
4. TX "clinical\* exam\*\*"
5. TX "physical exam\*"
6. TX provocat\*
7. 1 OR 2 OR 3 OR 4 OR 5 OR 6
8. (MH "Sensitivity and Specificity")
9. TX Sensitivity
10. TX Specificity
11. TX "predictive value\*"
12. TX "likelihood ratio\*"
13. TX "post-test probabilit\*" OR TX "posttest probabilit\*"
14. TX "pretest probabilit\*" OR TX "pre-test probabilit\*"
15. 8 OR 9 OR 10 OR 11 OR 12 OR 13 OR 14
16. MW hip\* OR TX hip OR hips
17. 7 AND 15 AND 16

**eTable 2. Characteristics of Included Studies (see eTable 3 for JAMA Rational Clinical Examination Quality Levels and Risk of Bias)**

| Study                             | Design       | Hips <sup>a</sup>                                          | Setting                                             | Population                                                                                                          | Demographics               | Clinical features                                                                                                                                                                                                                                                                                                                                                                                   |
|-----------------------------------|--------------|------------------------------------------------------------|-----------------------------------------------------|---------------------------------------------------------------------------------------------------------------------|----------------------------|-----------------------------------------------------------------------------------------------------------------------------------------------------------------------------------------------------------------------------------------------------------------------------------------------------------------------------------------------------------------------------------------------------|
| Altman 1991 <sup>1</sup>          | Cohort       | 201 (114 cases, 87 controls)                               | Hospitals throughout the USA.                       | Consecutive patients with symptomatic hip osteoarthritis and a control group with other causes for hip pain.        | Mean age 61; 36% female.   | History (pain distribution, pain on mobilising, reduced function, morning stiffness <60 minutes), family history, benefit of NSAIDs, OA elsewhere), physical examination (limp, range of movement, pain on movement, Trendelenburg positive, reflexes, leg shortening, Heberden's nodes), laboratory findings (Erythrocyte sedimentation rate <20mm/h, ESR <45mm/h, Rheumatoid factor <1:80 titer). |
| Bierma-Zeinstra 2002 <sup>2</sup> | Cohort       | 220 (78 OA, 142 non-OA; 25 severe OA, 195 not severe OA)   | Two hospitals in Rotterdam, The Netherlands.        | Consecutive patients aged >50 referred with hip pain.                                                               | Mean age 66; 73% female.   | History (aggravating features, pain distribution), physical examination (tenderness, range of motion, weakness, pain on movement).                                                                                                                                                                                                                                                                  |
| Birrell 2001 <sup>3</sup>         | Cohort       | 250 (84 OA, 166 non-OA; 26 severe OA, 164 not severe - OA) | Primary care, UK.                                   | Consecutive patients with hip pain presenting to 36 general practitioners with an interest in musculoskeletal pain. | Median age 63; 68% female. | Restricted hip range of movement (flexion, internal rotation, external rotation)                                                                                                                                                                                                                                                                                                                    |
| Holla 2012 <sup>4</sup>           | Cohort       | 344 (86 OA, 258 non-OA)                                    | Ten hospitals in The Netherlands.                   | Patients with hip symptoms from the Cohort Hip & Cohort Knee (CHECK) study.                                         | Mean age 56; 78% female.   | Restricted hip range of movement.                                                                                                                                                                                                                                                                                                                                                                   |
| Morvan 2009 <sup>5</sup>          | Case control | 237 (126 OA, 111 non-OA)                                   | Multiple hospitals in France.                       | Patients referred to rheumatology clinics with hip pain.                                                            | Mean age 58; 73% female.   | Four question screening questionnaire (pain in last 4w [hip, groin, upper thigh], pain when climbing stairs or walking down slopes, limited range of motion hip, do you have OA diagnosis)                                                                                                                                                                                                          |
| Sutlive 2008 <sup>6</sup>         | Cohort       | 72 (21 OA, 52 non-OA)                                      | Military healthcare beneficiary system, Texas, USA. | Patients aged >40 with unilateral pain in the buttock, groin, or anterior thigh.                                    | Mean age 59; 56% female.   | Gender, constant lumbar/buttock pain, groin pain same side, self-reported squatting aggravating factor, squat causing posterior pain, active hip flexion causing lateral pain, scour test (hip flexed to 90° then knee moved toward the opposite shoulder with axial load applied along the axis of the femur), passive IR <25°,                                                                    |

|  |  |  |  |  |  |                                                                                                                                                                                                                                          |
|--|--|--|--|--|--|------------------------------------------------------------------------------------------------------------------------------------------------------------------------------------------------------------------------------------------|
|  |  |  |  |  |  | Patrick's test <60° (reduced flexion, abduction, external rotation [FABER] range of movement to <60° as measured with an inclinometer), active hip extension causing hip pain, abduction or adduction causing groin pain, compound score |
|--|--|--|--|--|--|------------------------------------------------------------------------------------------------------------------------------------------------------------------------------------------------------------------------------------------|

Abbreviations: NSAID, nonsteroidal anti-inflammatory agents; OA, osteoarthritis, IR, internal rotation

<sup>a</sup>All studies adopted individual hips (either the hip referred, self-reported, or most symptomatic) as the unit of analysis but two studies<sup>3,4</sup> included data from symptomatic contralateral hips.

**eTable 3. Quality Assessment of Included Studies Using Rational Clinical Examination Levels of Evidence and QUADAS-2**

| Study                             | Level <sup>a</sup> | Patient selection |               | Index tests  |               | Reference standard |               | Flow and timing |               |
|-----------------------------------|--------------------|-------------------|---------------|--------------|---------------|--------------------|---------------|-----------------|---------------|
|                                   |                    | Risk of bias      | Applicability | Risk of bias | Applicability | Risk of bias       | Applicability | Risk of bias    | Applicability |
| Altman 1991 <sup>1</sup>          | 1                  | Low               | Low           | Low          | Low           | Low                | Low           | Low             | Low           |
| Bierma-Zeinstra 2002 <sup>2</sup> | 1                  | Low               | Low           | Low          | Low           | Low                | Low           | Low             | Low           |
| Birrell 2001 <sup>3</sup>         | 1                  | Low               | Low           | Low          | Low           | Low                | Low           | Low             | Low           |
| Holla 2012 <sup>4</sup>           | 1                  | Low               | Low           | Low          | Low           | Low                | Low           | Low             | Low           |
| Morvan 2009 <sup>5</sup>          | 1                  | Low               | Low           | Low          | Low           | Low                | Low           | Low             | Low           |
| Sutlive 2008 <sup>6</sup>         | 3                  | Low               | Low           | Low          | Low           | Low                | Low           | Low             | Low           |

**<sup>a</sup>JAMA Rational Clinical Examination Levels of Evidence**

1. Independent, blind comparison of symptoms or signs with a reference standard for hip osteoarthritis (plain radiographs) among a large cohort (>200) of consecutive patients with hip or groin pain.
2. Independent, blind comparison of symptoms or signs with a reference standard for hip osteoarthritis among a small number (<200) of consecutive patients with hip or groin pain.
3. Independent, blind comparison of symptoms or signs with a reference standard in non-consecutive patients with hip or groin pain.
4. Non-independent comparison of symptoms or signs with a reference standard among samples of patients who are known to have hip osteoarthritis.
5. Non-independent comparison of symptoms or signs with a reference standard of uncertain validity among samples of patients.

**eTable 4. History Findings and Likelihood of Hip Osteoarthritis**

| Feature                                                          | Threshold     | Sensitivity (95% CI) | Specificity (95% CI) | LR+ (95% CI)    | LR-(95% CI)      |
|------------------------------------------------------------------|---------------|----------------------|----------------------|-----------------|------------------|
| <b>GENERAL FEATURES</b>                                          |               |                      |                      |                 |                  |
| Family history of osteoarthritis <sup>1,a</sup>                  | Self-reported | 34 (25-44)           | 84 (74-91)           | 2.1 (1.2-3.6)   | 0.79 (0.67-0.93) |
| History of knee osteoarthritis <sup>1,a</sup>                    | Self-reported | 33 (24-43)           | 84 (73-92)           | 2.1 (1.1-3.8)   | 0.80 (0.68-0.95) |
| History of hand osteoarthritis <sup>1</sup>                      | Self-reported | 47 (37-57)           | 72 (60-82)           | 1.7 (1.1-2.6)   | 0.74 (0.58-0.92) |
| Age <sup>1,2,b</sup>                                             | >60           | 96 (80-99.9)         | 25 (29-42)           | 1.5 (1.3-1.7)   | 0.11 (0.02-0.78) |
|                                                                  | >50           | 91 (84-96)           | 28 (19-39)           | 1.3 (1.1-1.5)   | 0.32 (0.16-0.62) |
| Morning stiffness <60 minutes <sup>1,2,b</sup>                   | Self-reported | 56-91                | 41-67                | 1.5-1.7         | 0.22-0.65        |
| Female sex <sup>1,2,6</sup>                                      | Female        | 59 (39-80)           | 54 (22-86)           | 1.4 (0.81-1.9)  | 0.74 (0.53-0.94) |
| Benefit from NSAIDs <sup>1</sup>                                 | Self-reported | 71 (62-79)           | 51 (40-62)           | 1.4 (1.1-1.8)   | 0.57 (0.40-0.82) |
| Pain duration >3 months <sup>2</sup>                             | Self-reported | 80 (59-93)           | 38 (32-46)           | 1.3 (1.0-1.6)   | 0.52 (0.23-1.2)  |
| Contralateral hip symptomatic <sup>1,2</sup>                     | Self-reported | 20-42                | 54-88                | 0.91-1.6        | 0.91-1.1         |
| Nocturnal pain <sup>2</sup>                                      | Self-reported | 12 (2.5-31)          | 85 (79-90)           | 0.81 (0.27-2.5) | 1.0 (0.88-1.2)   |
| <b>LOCATION OF PAIN</b>                                          |               |                      |                      |                 |                  |
| Worst pain in medial thigh <sup>2,a</sup>                        | Self-reported | 12 (2.5-31)          | 98 (96-99.7)         | 7.8 (1.7-37)    | 0.89 (0.77-1.0)  |
| Groin pain <sup>1,2,6</sup>                                      | Self-reported | 39 (31-47)           | 74 (52-96)           | 1.7 (0.01-3.4)  | 0.89 (0.54-1.23) |
| Foot pain <sup>6</sup>                                           | Self-reported | 43 (22-66)           | 71 (56-82)           | 1.5 (0.81-2.8)  | 0.8 (0.5-1.2)    |
| Worst pain in anterior thigh <sup>2,6</sup>                      | Self-reported | 12-33                | 74-77                | 1.4-1.5         | 0.87-1.0         |
| Radiation to knee <sup>1,2</sup>                                 | Self-reported | 32-64                | 16-71                | 0.76-1.1        | 0.96-2.2         |
| Posterior thigh pain <sup>6</sup>                                | Self-reported | 24 (8.2-47)          | 74 (60-86)           | 0.93 (0.38-2.3) | 1.0 (0.77-1.4)   |
| Worst pain over trochanter <sup>2</sup>                          | Self-reported | 24 (9.4-45)          | 69 (62-75)           | 0.77 (0.37-1.6) | 1.1 (0.87-1.4)   |
| Lateral thigh pain <sup>1,2</sup>                                | Self-reported | 4.0-57               | 44-92                | 0.52-1.0        | 0.98-1.0         |
| Worst pain in buttock <sup>2,6</sup>                             | Self-reported | 12-67                | 57-69                | 0.38-1.6        | 0.59-1.3         |
| <b>ACTIVITIES WORSENING PAIN</b>                                 |               |                      |                      |                 |                  |
| Pain on climbing upstairs or walking down slopes <sup>5,ab</sup> | Self-reported | 68 (59-76)           | 68 (58-76)           | 2.1 (1.6-2.8)   | 0.47 (0.35-0.63) |
| Pain on initial steps after rest <sup>2</sup>                    | Self-reported | 92 (74-99)           | 26 (20-32)           | 1.2 (1.1-1.4)   | 0.31 (0.08-1.2)  |
| Pain on walking <sup>1,2, b</sup>                                | Self-reported | 80-97                | 12-34                | 1.1-1.2         | 0.25-0.58        |
| Pain aggravated by lying on side <sup>2</sup>                    | Self-reported | 60 (39-79)           | 37 (31-45)           | 0.96 (0.68-1.3) | 1.1 (0.64-1.8)   |
| Pain relieved by sitting <sup>2</sup>                            | Self-reported | 92 (1.0-26)          | 33 (60-73)           | 1.4 (0.2-1.6)   | 0.24 (0.06-0.9)  |

<sup>a</sup>Positive likelihood ratio  $\geq 2.0$ ;

<sup>b</sup>Negative likelihood ratio  $\leq 0.5$ .

**eTable 5. Physical Examination Findings and Likelihood of Hip Osteoarthritis**

| Feature                                                | Threshold                                                              | Sensitivity<br>(95% CI) | Specificity<br>(95% CI) | LR+<br>(95% CI)  | LR-<br>(95% CI)  |
|--------------------------------------------------------|------------------------------------------------------------------------|-------------------------|-------------------------|------------------|------------------|
| <b>GENERAL FINDINGS</b>                                |                                                                        |                         |                         |                  |                  |
| Abductor weakness <sup>2,a</sup>                       | Measured with the patient lying down                                   | 44 (24-65)              | 90 (85-94)              | 4.5 (2.4-8.4)    | 0.62 (0.43-0.88) |
| Limp <sup>1,b</sup>                                    | Present                                                                | 85 (76-92)              | 43 (31-55)              | 1.5 (1.2-1.9)    | 0.35 (0.20-0.61) |
| Short leg length <sup>1</sup>                          | Measured anterior superior iliac crest to the medial malleolus.        | 42 (31-53)              | 72 (60-82)              | 1.5 (1.0-2.4)    | 0.80 (0.63-1.0)  |
| Trendelenburg sign <sup>1,2</sup>                      | Inability to keep pelvis parallel to ground while standing on one leg. | 37-48                   | 64- 81                  | 1.3-1.9          | 0.78-0.81        |
| Heberden's nodes <sup>1,2</sup>                        | Present                                                                | 36-58                   | 73-74                   | 1.3-2.2          | 0.58-0.87        |
| Bony enlargement of the knee <sup>1</sup>              | Present                                                                | 23 (16-32)              | 82 (72-89)              | 1.3 (0.73-2.3)   | 0.94 (0.81-1.1)  |
| Patellar reflex <sup>1</sup>                           | Present                                                                | 96 (90-99)              | 6.2 (2.0-14)            | 1.0 (1.0-1.1)    | 0.67 (0.18-2.3)  |
| Achilles reflex <sup>1</sup>                           | Present                                                                | 85 (77-92)              | 12 (6.1-22)             | 0.87 (0.87-1.1)  | 1.3 (0.56-2.5)   |
| Increased knee temperature <sup>1</sup>                | Present                                                                | 3.6 (1.0-8.9)           | 81 (71-89)              | 0.21 (0.07-0.54) | 1.2 (1.1-1.3)    |
| <b>PAIN ON PALPATION</b>                               |                                                                        |                         |                         |                  |                  |
| Inguinal ligament tenderness <sup>2,a</sup>            | Present                                                                | 60 (39-79)              | 75 (68-81)              | 2.4 (1.6-3.8)    | 0.53 (0.33-0.87) |
| Tensor fascia lata tenderness <sup>2</sup>             | Present                                                                | 40 (21-61)              | 80 (73-85)              | 2.0 (1.1-3.4)    | 0.75 (0.54-1.1)  |
| Gluteus medius tenderness <sup>2</sup>                 | Present                                                                | 60 (39-79)              | 62 (55-69)              | 1.6 (1.1-2.3)    | 0.64 (0.54-0.71) |
| Sacroiliac joint tenderness <sup>2</sup>               | Present                                                                | 48 (28-69)              | 65 (58-72)              | 1.4 (0.88-2.2)   | 0.80 (0.54-1.2)  |
| Gluteus maximus tenderness <sup>2</sup>                | Present                                                                | 48 (28-69)              | 61 (54-68)              | 1.2 (0.79-1.9)   | 0.85 (0.58-1.3)  |
| Iliopsoas tenderness <sup>2</sup>                      | Present                                                                | 20 (6.8-41)             | 84 (78-88)              | 1.2 (0.52-2.8)   | 0.96 (0.78-1.2)  |
| Superior posterior iliac spine tenderness <sup>2</sup> | Present                                                                | 36 (18-58)              | 64 (57-71)              | 1.0 (0.58-1.8)   | 1.0 (0.73-1.4)   |
| Ischial nerve tenderness <sup>2</sup>                  | Present                                                                | 12 (2.5-31)             | 83 (77-88)              | 0.71 (0.24-2.1)  | 1.1 (0.90-1.2)   |
| <b>PAIN ON MOVEMENT AND PROVOCATION TESTS</b>          |                                                                        |                         |                         |                  |                  |
| Squat causing posterior pain <sup>6,a</sup>            | Test as described by Sutlive et al <sup>6</sup> .                      | 24 (8.2-47)             | 96 (86-99.5)            | 6.1 (1.3-29)     | 0.79 (0.62-1.0)  |
| Groin pain on abduction or adduction <sup>6,a</sup>    | Present                                                                | 33 (15-57)              | 94 (84-99)              | 5.7 (1.6-20)     | 0.71 (0.52-0.97) |
| Scour test <sup>6,a</sup>                              | Test as described by Sutlive et al.                                    | 62 (42-82)              | 74 (60-86)              | 2.4 (1.4-4.3)    | 0.51 (0.29-0.90) |
| Pain on hip adduction <sup>1,2,b</sup>                 | Present                                                                | 68 -80                  | 46 -54                  | 1.5-1.5          | 0.43-0.59        |
| Pain on hip internal rotation <sup>1,2,b</sup>         | Present                                                                | 82 -88                  | 38 -39                  | 1.4-1.4          | 0.31-0.45        |
| Pain on hip extension <sup>1,2,6</sup>                 | Present                                                                | 62 (54-70)              | 63 (68-92)              | 1.4 (1.1-1.7)    | 0.67 (0.51-0.89) |
| Pain on hip abduction <sup>1</sup>                     | Present                                                                | 92 (74-99)              | 32 (26-39)              | 1.4 (1.2-1.6)    | 0.55 (0.36-0.83) |



|                                                       |                                                                                                        |                 |                 |                            |                  |
|-------------------------------------------------------|--------------------------------------------------------------------------------------------------------|-----------------|-----------------|----------------------------|------------------|
| Pain on hip external rotation <sup>1,2</sup>          | Present                                                                                                | 64 -79          | 37-61           | 1.3-1.6                    | 0.57-0.59        |
| Pain on hip flexion <sup>1,2,6</sup>                  | Present                                                                                                | 64 (48-81)      | 47 (0.70-93)    | 1.1 (0.46-1.7)             | 0.67 (0.26-1.1)  |
| <b>TESTS OF MOTION</b>                                |                                                                                                        |                 |                 |                            |                  |
| Restricted movement <sup>3,a</sup>                    | 3 planes                                                                                               | NA <sup>c</sup> | NA <sup>c</sup> | 4.5 (2.4-8.4) <sup>c</sup> | NA <sup>c</sup>  |
|                                                       | 2 planes                                                                                               | NA <sup>c</sup> | NA <sup>c</sup> | 1.5 (0.90-2.6)             | NA <sup>c</sup>  |
|                                                       | 1 plane                                                                                                | NA <sup>c</sup> | NA <sup>c</sup> | 1.3 (0.85-2.0)             | NA <sup>c</sup>  |
|                                                       | 0 planes                                                                                               | NA <sup>c</sup> | NA <sup>c</sup> | 0.91 (0.78-1.1)            | NA <sup>c</sup>  |
| Decreased hip adduction <sup>2,ab</sup>               | Goniometer compared with published normal values <sup>7,8</sup> and/or comparison to contralateral hip | 80 (59-93)      | 81 (75-86)      | 4.2 (3.0-6.0)              | 0.25 (0.11-0.54) |
| Decreased hip internal rotation <sup>1,2,4,6,ab</sup> | Goniometer compared with published normal values <sup>7,8</sup> and/or comparison to contralateral hip | 66 (47-81)      | 79 (57-92)      | 3.2 (1.7-6.0)              | 0.43 (0.31-0.60) |
| Decreased range of movement <sup>5,ab</sup>           | Goniometer compared with published normal values <sup>7,8</sup> and/or comparison to contralateral hip | 75 (66-82)      | 74 (65-82)      | 2.9 (2.1-4.0)              | 0.34 (0.25-0.47) |
| Decreased hip extension <sup>2,ab</sup>               | Goniometer compared with published normal values <sup>7,8</sup> and/or comparison to contralateral hip | 76 (55-91)      | 68 (61-75)      | 2.4 (1.8-3.2)              | 0.35 (0.17-0.71) |
| Decreased hip external rotation <sup>2,ab</sup>       | Goniometer compared with published normal values <sup>7,8</sup> and/or comparison to contralateral hip | 76 (55-91)      | 64 (57-71)      | 2.1 (1.6-2.8)              | 0.37 (0.19-0.76) |
| Decreased hip abduction <sup>2,b</sup>                | Goniometer compared with published normal values <sup>7,8</sup> and/or comparison to contralateral hip | 88 (69-98)      | 46 (38-53)      | 1.6 (1.3-2.1)              | 0.26 (0.09-0.77) |
| Decreased hip flexion <sup>1,2,4</sup>                | Goniometer compared with published normal values <sup>7,8</sup> and/or comparison to contralateral hip | 68 (24-11)      | 54 (18-89)      | 1.6 (1.0-2.2)              | 0.51 (0.14-0.88) |

Abbreviation: NA, not applicable.

<sup>a</sup>Positive likelihood ratio  $\geq 2.0$ ;

<sup>b</sup>Negative likelihood ratio  $\leq 0.5$ ;

<sup>c</sup>For ordinal data shown from 0 planes to 3 planes, sensitivity and specificity do not apply. Results shown as serial LR to show the increasing likelihood of restricted movements from 0 to 3 different affected planes;

**eTable 6. Combinations of Clinical Signs and Likelihood of Hip Osteoarthritis**

| Feature                                                                                                                                                                                                                                                        | Threshold       | Sensitivity (95% CI) | Specificity (95% CI) | LR+ (95% CI)      | LR- (95% CI)    |
|----------------------------------------------------------------------------------------------------------------------------------------------------------------------------------------------------------------------------------------------------------------|-----------------|----------------------|----------------------|-------------------|-----------------|
| <b>ANY HIP OA</b>                                                                                                                                                                                                                                              |                 |                      |                      |                   |                 |
| Number of signs <sup>2,a</sup><br><i>Age &gt;60, pain lasting longer than 3 months, no pain aggravation by sitting, groin tenderness, decreased external rotation.</i>                                                                                         | Five signs      | NA <sup>b</sup>      | NA <sup>b</sup>      | 4.1 (1.3-13)      | NA <sup>b</sup> |
|                                                                                                                                                                                                                                                                | Four signs      | NA <sup>b</sup>      | NA <sup>b</sup>      | 5.3 (2.6-11)      | NA <sup>b</sup> |
|                                                                                                                                                                                                                                                                | Three signs     | NA <sup>b</sup>      | NA <sup>b</sup>      | 0.84 (0.56-1.3)   | NA <sup>b</sup> |
|                                                                                                                                                                                                                                                                | Two signs       | NA <sup>b</sup>      | NA <sup>b</sup>      | 0.61 (0.37-1.0)   | NA <sup>b</sup> |
|                                                                                                                                                                                                                                                                | One sign        | NA <sup>b</sup>      | NA <sup>b</sup>      | 0.26 (0.10-0.71)  | NA <sup>b</sup> |
|                                                                                                                                                                                                                                                                | No signs        | NA <sup>b</sup>      | NA <sup>b</sup>      | 0.26 (0.01-5.0)   | NA <sup>b</sup> |
| <b>SEVERE HIP OA</b>                                                                                                                                                                                                                                           |                 |                      |                      |                   |                 |
| Number of signs <sup>2,a</sup><br><i>Age &gt;60, inguinal ligament tenderness, decreased external rotation, decreased internal rotation, decreased adduction, bony restriction in one of the directions using passive hip movement, hip abductor weakness.</i> | Seven signs     | NA <sup>b</sup>      | NA <sup>b</sup>      | 38 (1.9-764)      | NA <sup>b</sup> |
|                                                                                                                                                                                                                                                                | Six signs       | NA <sup>b</sup>      | NA <sup>b</sup>      | 128 (7.6-2156)    | NA <sup>b</sup> |
|                                                                                                                                                                                                                                                                | Five signs      | NA <sup>b</sup>      | NA <sup>b</sup>      | 16 (5.1-48.1)     | NA <sup>b</sup> |
|                                                                                                                                                                                                                                                                | Four signs      | NA <sup>b</sup>      | NA <sup>b</sup>      | 2.0 (0.88-4.3)    | NA <sup>b</sup> |
|                                                                                                                                                                                                                                                                | Three signs     | NA <sup>b</sup>      | NA <sup>b</sup>      | 0.10 (0.01-1.5)   | NA <sup>b</sup> |
|                                                                                                                                                                                                                                                                | Two signs       | NA <sup>b</sup>      | NA <sup>b</sup>      | 0.06 (0.004-0.86) | NA <sup>b</sup> |
|                                                                                                                                                                                                                                                                | One sign        | NA <sup>b</sup>      | NA <sup>b</sup>      | 0.16 (0.02-1.1)   | NA <sup>b</sup> |
| No signs                                                                                                                                                                                                                                                       | NA <sup>b</sup> | NA <sup>b</sup>      | 0.28 (0.02-4.6)      | NA <sup>b</sup>   |                 |

Abbreviation: NA, not applicable.

<sup>a</sup>Positive likelihood ratio  $\geq 2.0$ ;

<sup>b</sup>For ordinal data shown as increasing number of abnormalities, sensitivity and specificity do not apply. Results shown as serial LR to show the increasing likelihood of hip osteoarthritis the number of abnormal findings increase.

## References

1. Altman R, Alarcon G, Appelrouth D, et al. The American College of Rheumatology criteria for the classification and reporting of osteoarthritis of the hip. *Arthritis Rheum*. 1991;34(5):505-514.
2. Bierma-Zeinstra SM, Oster JD, Bernsen RM, Verhaar JA, Ginai AZ, Bohnen AM. Joint space narrowing and relationship with symptoms and signs in adults consulting for hip pain in primary care. *J Rheumatol*. 2002;29(8):1713-1718.
3. Birrell F, Croft P, Cooper C, et al. Predicting radiographic hip osteoarthritis from range of movement. *Rheumatology (Oxford)*. 2001;40(5):506-512.
4. Holla JF, van der Leeden M, Roorda LD, et al. Diagnostic accuracy of range of motion measurements in early symptomatic hip and/or knee osteoarthritis. *Arthritis Care Res (Hoboken)*. 2012;64(1):59-65.
5. Morvan J, Roux CH, Fautrel B, et al. A case-control study to assess sensitivity and specificity of a questionnaire for the detection of hip and knee osteoarthritis. *Arthritis Rheum*. 2009;61(1):92-99.
6. Sutlive TG, Lopez HP, Schnitker DE, et al. Development of a clinical prediction rule for diagnosing hip osteoarthritis in individuals with unilateral hip pain. *J Orthop Sports Phys Ther*. 2008;38(9):542-550.
7. Boone DC, Azen SP. Normal range of motion of joints in male subjects. *J Bone Joint Surg Am*. 1979;61(5):756-759.
8. Roach KE, Miles TP. Normal hip and knee active range of motion: the relationship to age. *Phys Ther*. 1991;71(9):656-665.
